# Supplementary material for: Dapagliflozin alleviates renal podocyte pyroptosis via regulation of the HO‑1/NLRP3 axis
Source: PubMed Central journal article supplement — Mol Med Rep. 2023 Sep 8;28(5):200. doi: 10.3892/mmr.2023.13087 (PMC10539996; doi:10.3892/mmr.2023.13087), 2023-09-08

Figure S1. Photomicrographs of double-fluorescent staining with Hoechst 33342/PI. PA, 0.2 mmol; Dapa, 2  $\mu$ mol; MCC950: 1  $\mu$ mol; scale bar, 100  $\mu$ m. PA, palmitic acid; Dapa, dapagliflozin.

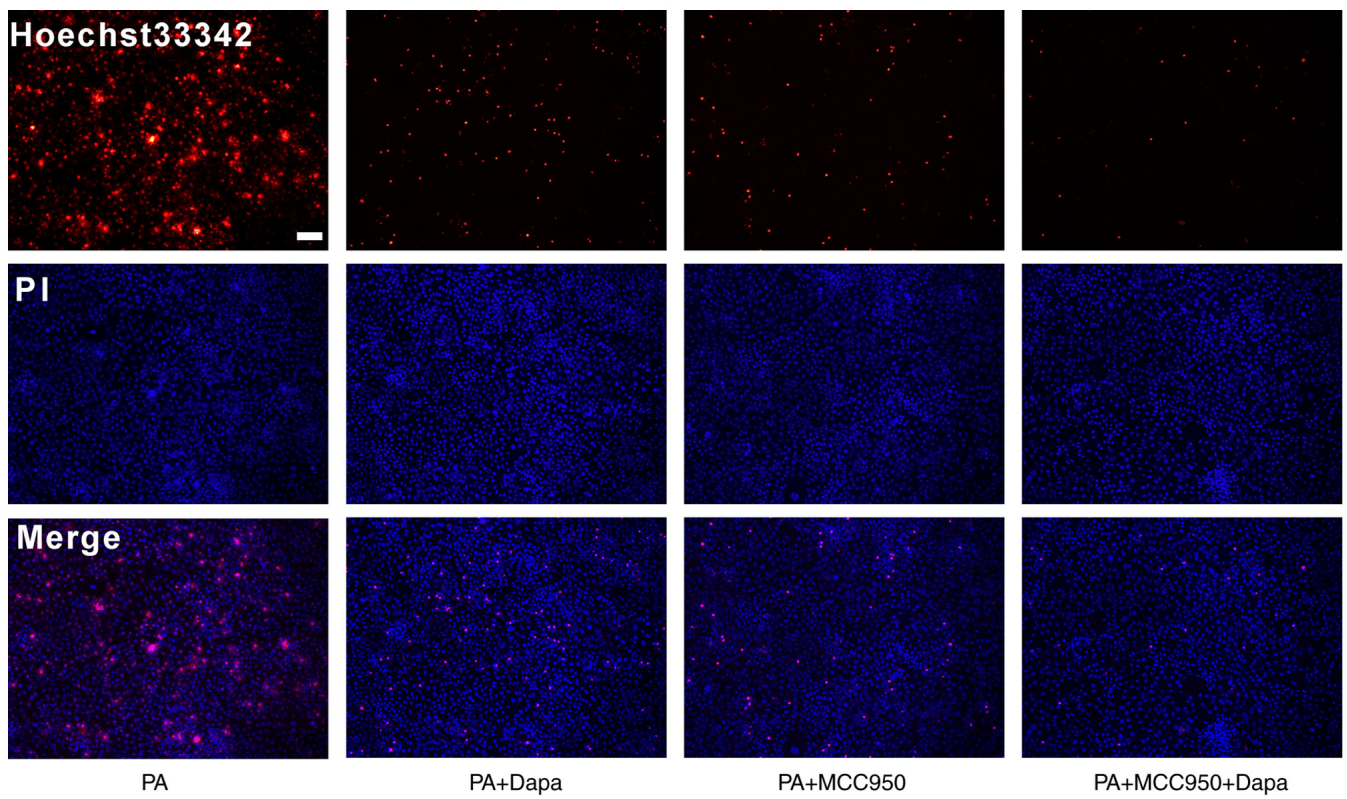

Figure S2. Effect of HO-1 knockdown and overexpression. (A) Knockdown of HO-1 blocks the beneficial effect of dapagliflozin on pyroptosis. (B) The protein expression level of HO-1 after transfection. PA, 0.2 mmol; Dapa, 2  $\mu$ mol. HO-1, heme oxygenase 1.

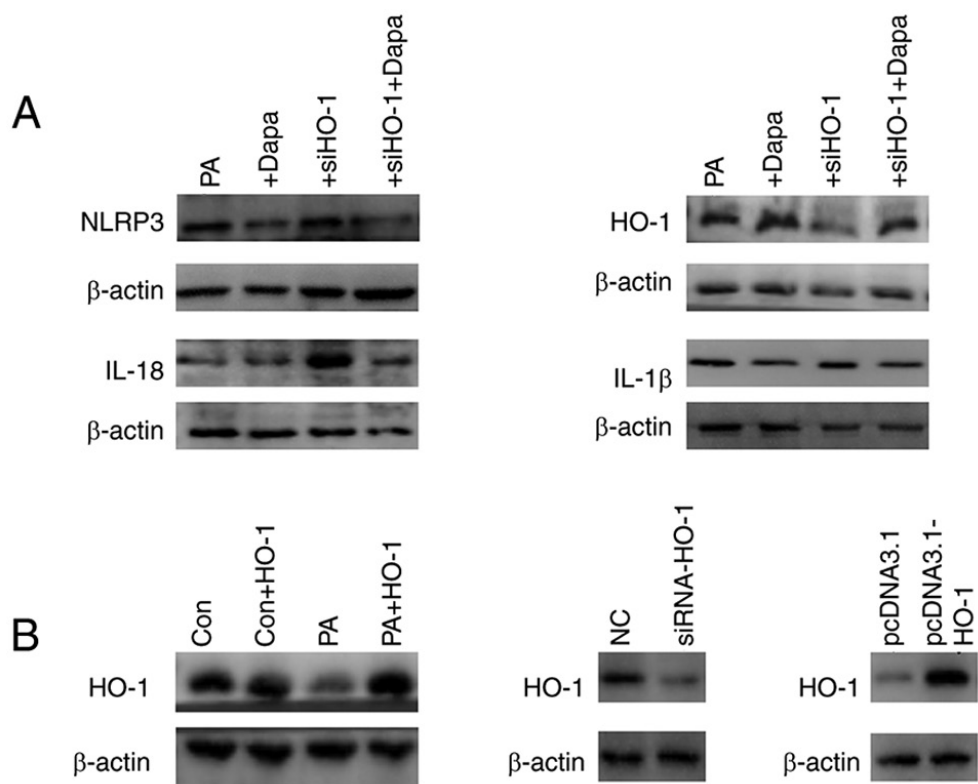

Supplement: Supplementary_Data.pdf [file Supplementary_Data.pdf]
